# Supplementary material
Source: PubMed Central journal article supplement (PMC7298503)
Supplement: mmc1.pdf [file mmc1.pdf]

## Views on COVID-19 and 2020 Urology Residency Applications

The COVID-19 pandemic has dramatically changed human communication and behavior. As we approach the upcoming 2020 interview cycle for Urology, it is important that we structure our interview process to reflect current attitudes toward this process.

In order to make this a data-driven process, we would like to anonymously solicit your opinions on interviewing in the current environment. **We would like you to answer the questions in the context of the upcoming interview season and with the benefit of your recent experiences and best working knowledge of current pandemic conditions.**

|                                                                                                                                                                               |                                                                                                                                                                                                                                                                                                                  |
|-------------------------------------------------------------------------------------------------------------------------------------------------------------------------------|------------------------------------------------------------------------------------------------------------------------------------------------------------------------------------------------------------------------------------------------------------------------------------------------------------------|
| <b>Age</b>                                                                                                                                                                    | <input type="text"/>                                                                                                                                                                                                                                                                                             |
| <b>Gender</b>                                                                                                                                                                 | <input type="text" value=""/>                                                                                                                                                                                                                                                                                    |
| <b>I identify as___ (select all that apply)</b>                                                                                                                               | <input type="checkbox"/> African-American/Black<br><input type="checkbox"/> Asian<br><input type="checkbox"/> Caucasian<br><input type="checkbox"/> Hispanic/Latino<br><input type="checkbox"/> Native American/Pacific Islander<br><input type="checkbox"/> Other<br><input type="checkbox"/> Prefer not to say |
| <b>What are your plans for 2020?</b>                                                                                                                                          | <input type="radio"/> Starting urology residency<br><input type="radio"/> Reapplying to urology residency<br><input type="radio"/> Already a urology resident<br><input type="radio"/> Other (comment below)                                                                                                     |
| <b>Should away rotations be cancelled for the upcoming interview season?</b>                                                                                                  | <input type="radio"/> Yes<br><input type="radio"/> No<br><input type="radio"/> Not sure                                                                                                                                                                                                                          |
| <b>Should the 2020 Urology interview process be moved to align with the standard NRMP match schedule (Match Day in March)?</b>                                                | <input type="radio"/> Yes<br><input type="radio"/> No<br><input type="radio"/> Not sure                                                                                                                                                                                                                          |
| <b>If you were to participate in interviews this year, what would you prefer?</b>                                                                                             | <input type="radio"/> Travel (traditional interviews)<br><input type="radio"/> Virtual interview<br><input type="radio"/> Centralized location for all interviews<br><input type="radio"/> Regional interviews (Northeast, Southeast, Northwest, Southwest, Central)                                             |
| <b>Did you do a second look?</b>                                                                                                                                              | <input type="radio"/> Yes<br><input type="radio"/> No                                                                                                                                                                                                                                                            |
| <b>In the pre-COVID era, there were discussions of discouraging second look visits. If 2020 interviews are changed to a virtual platform, should second looks be allowed?</b> | <input type="radio"/> Yes they should be encouraged<br><input type="radio"/> Yes they should be allowed but not encouraged<br><input type="radio"/> Unsure<br><input type="radio"/> No they should not be allowed (comment below)                                                                                |
| <br><br><br><br><br>                                                                                                                                                          |                                                                                                                                                                                                                                                                                                                  |

**What aspect of the interview experience mattered the most to you?**

- Faculty interviews
- Resident interviews
- Interactions with residents
- Tours
- Informative talks
- Visiting the site location
- Second looks

[reset](#)

---

**How much did the following experiences impact your rank list?**

|                                     | No impact             | Small impact          | Moderate Impact       | Large impact          | Very large impact     |
|-------------------------------------|-----------------------|-----------------------|-----------------------|-----------------------|-----------------------|
| Pre/post-interview social or dinner | <input type="radio"/> |
| Faculty Interviews                  | <input type="radio"/> |
| Resident Interviews                 | <input type="radio"/> |
| Facility tours                      | <input type="radio"/> |
| Informational talks                 | <input type="radio"/> |
| Visiting the city                   | <input type="radio"/> |
| Second Look                         | <input type="radio"/> |

[reset](#)

---

**Do you agree that the following experiences can be replicated on an online platform?**

|                                     | Strongly disagree     | Slightly disagree     | Neutral               | Slightly agree        | Strongly agree        |
|-------------------------------------|-----------------------|-----------------------|-----------------------|-----------------------|-----------------------|
| Pre/post Interview social or dinner | <input type="radio"/> |
| Faculty interviews                  | <input type="radio"/> |
| Resident interviews                 | <input type="radio"/> |
| Facility tours                      | <input type="radio"/> |
| Informational talks                 | <input type="radio"/> |
| Visiting the city                   | <input type="radio"/> |
| Second look                         | <input type="radio"/> |

[reset](#)

---

**Which of the following online platforms would most effectively recreate an in-person pre/post-interview social/dinner?**

- Group Videoconference (Zoom/Microsoft Teams)
- Scheduled one-on-one videoconference with current residents
- Online games with residents (e.g. Uno!, Jackbox, Mario Kart, Scattergories)
- No online platform would suffice
- Other (comment below)

[reset](#)

---

**Which of the following online platforms would most effectively recreate an in-person interview?**

|                    | Group Videoconference | Scheduled one-on-one videoconference | No online platform would suffice | Other (comment below) |
|--------------------|-----------------------|--------------------------------------|----------------------------------|-----------------------|
| Faculty interview  | <input type="radio"/> | <input type="radio"/>                | <input type="radio"/>            | <input type="radio"/> |
| Resident interview | <input type="radio"/> | <input type="radio"/>                | <input type="radio"/>            | <input type="radio"/> |

[reset](#)

**Which of the following online platforms would most effectively recreate...**

|                            | <b>Pre-made video</b> | <b>Live-streamed video</b> | <b>No online platform would suffice</b> | <b>Other (comment below)</b>                |
|----------------------------|-----------------------|----------------------------|-----------------------------------------|---------------------------------------------|
| <b>Facility tour</b>       | <input type="radio"/> | <input type="radio"/>      | <input type="radio"/>                   | <input type="radio"/> <a href="#">reset</a> |
| <b>Informational talks</b> | <input type="radio"/> | <input type="radio"/>      | <input type="radio"/>                   | <input type="radio"/> <a href="#">reset</a> |
| <b>Visiting the city</b>   | <input type="radio"/> | <input type="radio"/>      | <input type="radio"/>                   | <input type="radio"/> <a href="#">reset</a> |
| <b>Second Look</b>         | <input type="radio"/> | <input type="radio"/>      | <input type="radio"/>                   | <input type="radio"/> <a href="#">reset</a> |

Powered by REDCap
